# Supplementary material
Source: MDPI journal article supplement (https://www.mdpi.com/2073-8994/13/11/2022)
Supplement: s1 [file s1]

# Molecular Recognition, Transient Chirality and Sulfur Hydrogen Bonding in the Benzyl Mercaptan Dimer

## SUPPORTING INFORMATION

Rizalina Tama Saragi,<sup>1</sup> Marcos Juanes,<sup>1</sup> Ruth Pinacho,<sup>2</sup> José E. Rubio,<sup>2</sup> José A. Fernández,<sup>3</sup>  
Alberto Lesarri,<sup>\*1</sup>

<sup>1</sup> Departamento de Química Física y Química Inorgánica and I.U. CINQUIMA, Facultad de Ciencias, Universidad de Valladolid, Paseo de Belén, 7, 47011 Valladolid (Spain)

<sup>2</sup> Departamento de Electrónica, Escuela de Ingeniería de Telecomunicaciones, Universidad de Valladolid, Paseo de Belén, 15, 47011 Valladolid (Spain)

<sup>3</sup> Departamento de Química Física, Facultad de Ciencia y Tecnología, Universidad del País Vasco, Apartado 644, 48080 Bilbao (Spain)

\* Correspondence: [alberto.lesarri@uva.es](mailto:alberto.lesarri@uva.es)

**Figure S1.** Rotational spectrum of benzyl mercaptan in the 3-8 GHz frequency region. The positive trace shows the experimental spectrum; the negative trace is the simulation of fitted rotational constants of the monomer and the dimer (isomer 1, GG-GG-Lp-).

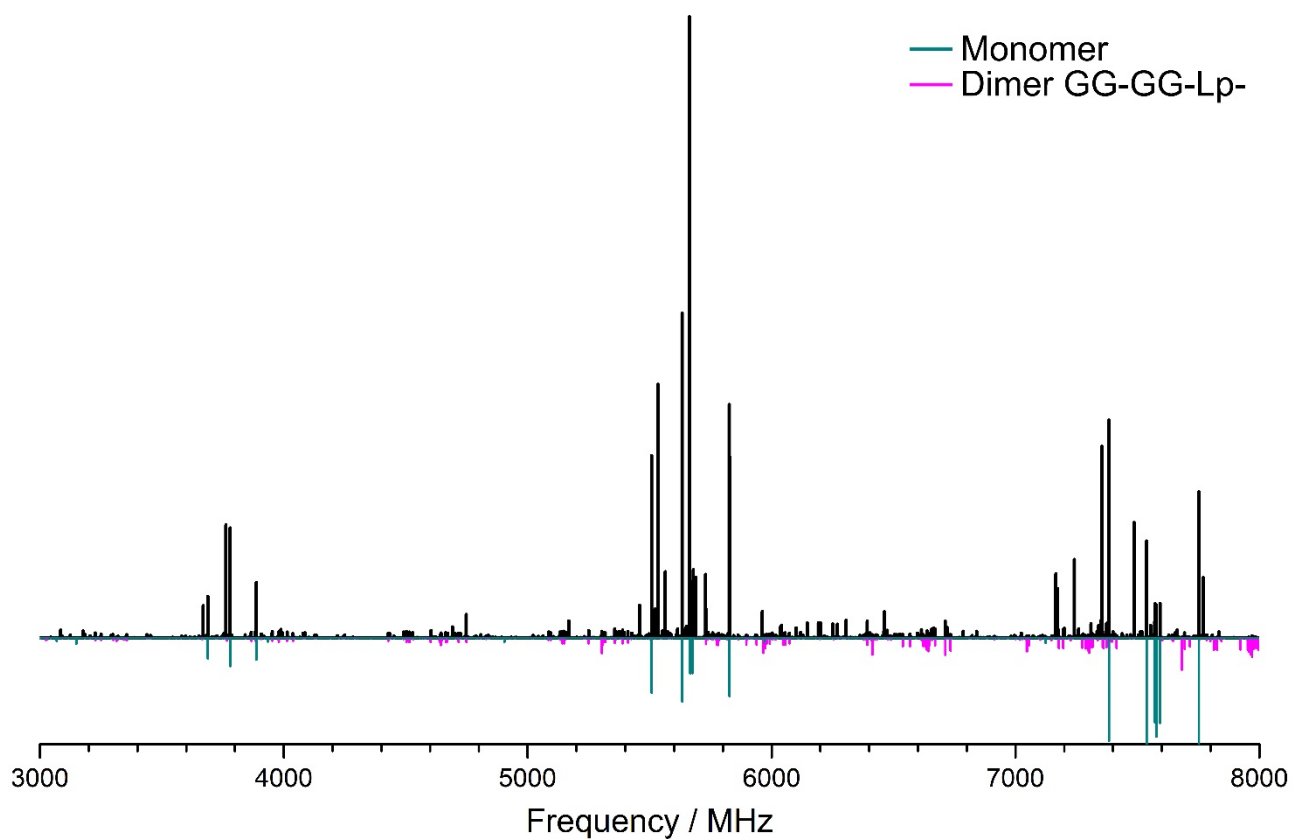

**Figure S2.** The most stable isomers of the benzyl mercaptan dimer, classified by their intermolecular interactions and ordered by the relative electronic energy ( $\Delta E_{\text{ZPE}}$ , kJ/mol) calculated using B3LYP-D3(BJ)/def2-TZVP. Isomers in the dashed rectangle exhibit a sulfur S-H $\cdots$ S hydrogen bond. The only symmetric isomers are 5 ( $C_2$ ), 9 ( $C_2$ ) and 11 ( $C_i$ ).

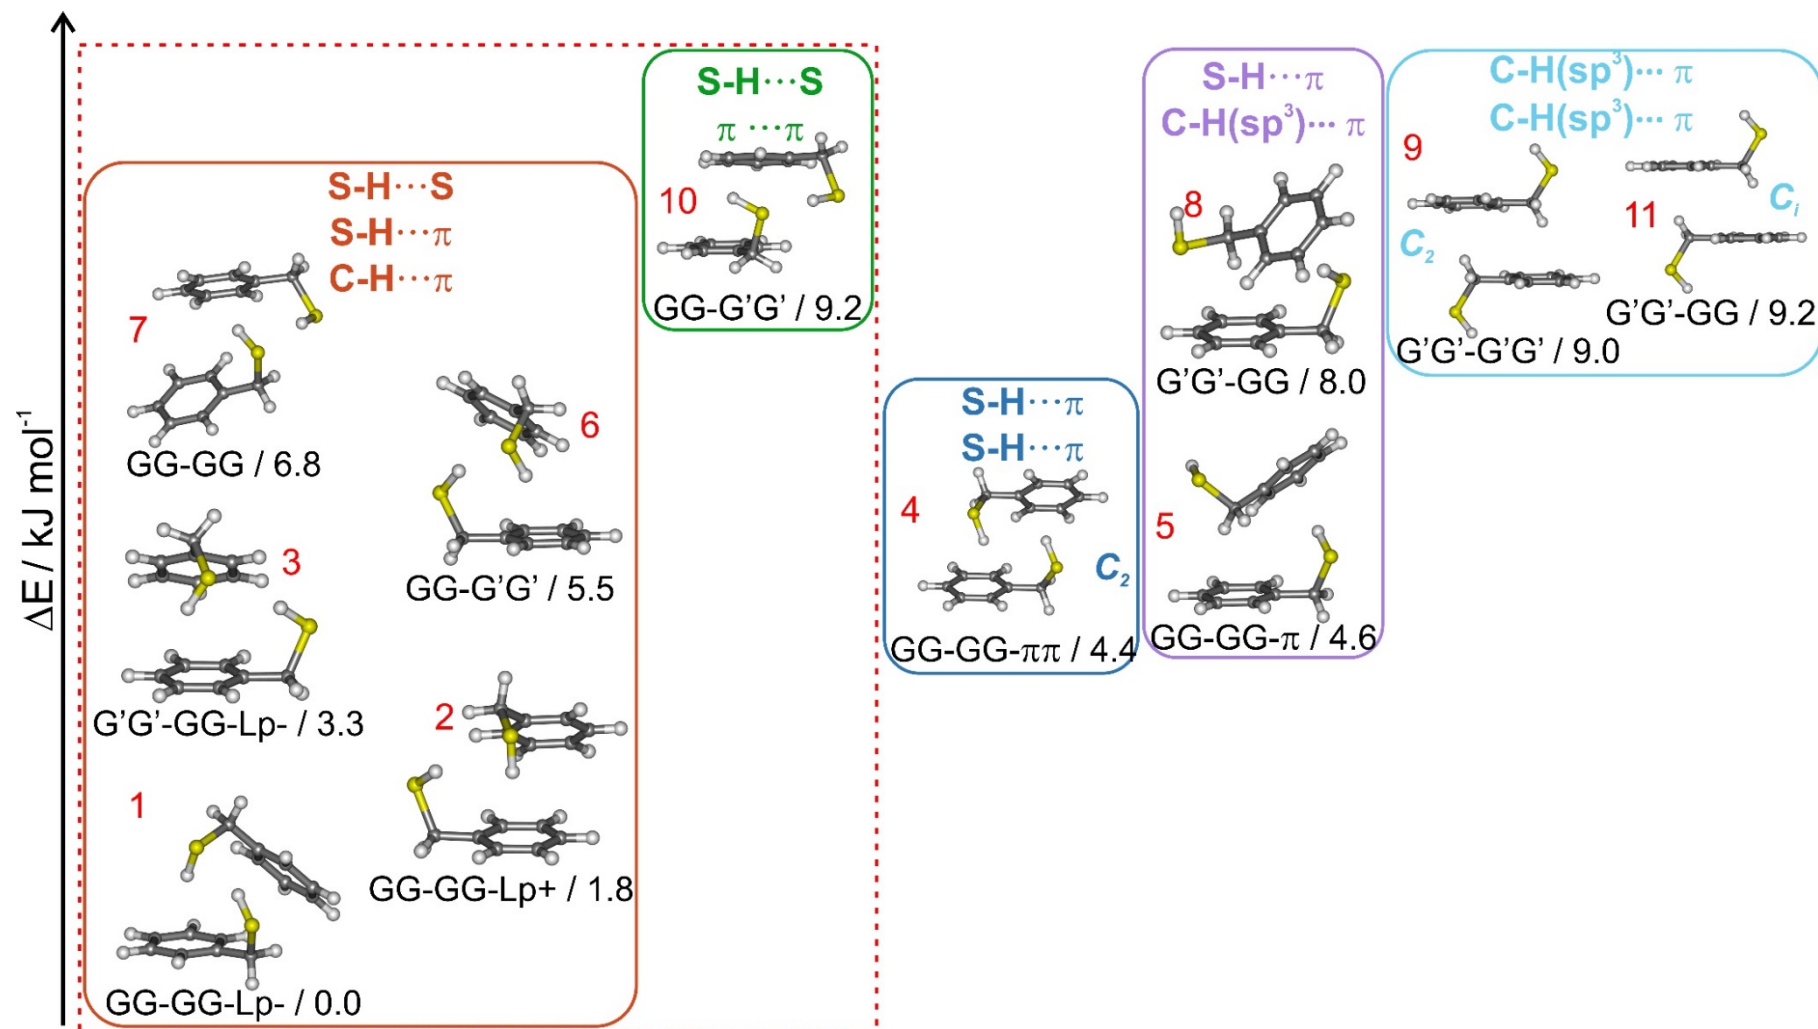

**Figure S3.** A rotatable 3D figure of the two most stable isomers of the benzyl mercaptan dimer.

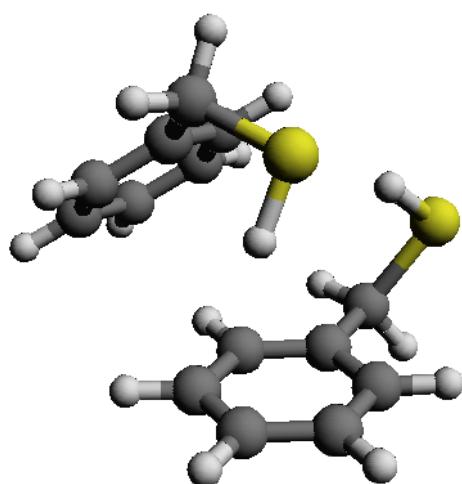

**Figure S4.** A comparison of the two asymmetric ( $C_1$ ) most stable isomers of the benzyl mercaptan dimer. Isomers 1 ( $G'G'-G'G'-Lp^+ = GG-GG-Lp^-$ , left) and 2 ( $G'G'-G'G'-Lp^- = GG-GG-Lp^+$ , right), are both homochiral but differ in the acceptor lone pair position of sulfur (the dihedral formed by the lone pair or  $\tau(LpS-C\alpha C_{ipso})$  have different signs for isomer 1 and isomer 2), producing a change of relative orientation between the rings.

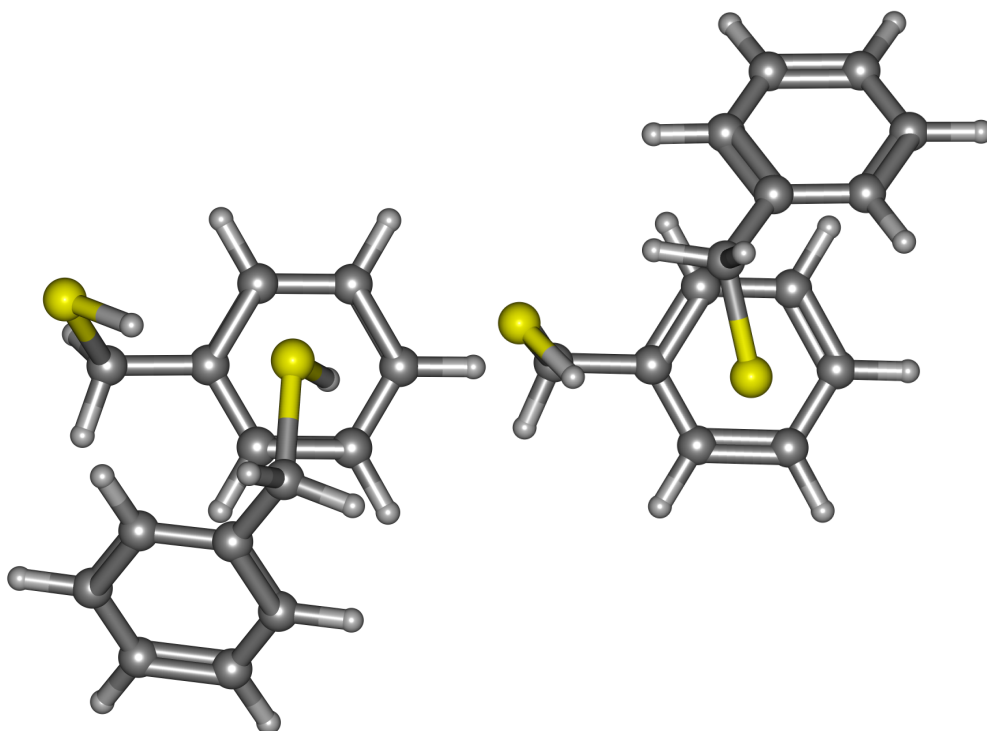

**Figure S5.** A comparison of the two asymmetric ( $C_1$ ) most stable isomers of the benzyl mercaptan dimer. Isomers 1 ( $G'G'-G'G'-Lp^+ = GG-GG-Lp^-$ , left) and 3 ( $GG-G'G'-Lp^+ = G'G'-GG-Lp^-$ , right) differ in the stereochemistry of the donor group, either homochiral in isomer 1 or heterochiral in isomer 3.

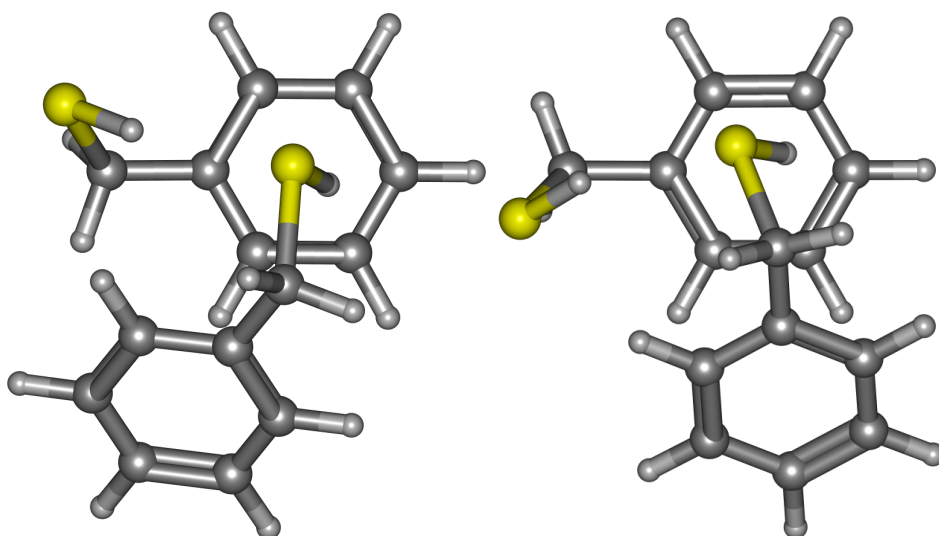

**Figure S6.** The most stable symmetric dimer of benzyl mercaptan (isomer 5 GG-GG- $\pi\pi$ ) has  $C_2$  symmetry but avoids the parallel arrangement of the two phenyl rings, unlike in the symmetric benzyl alcohol dimer. The Figure shows the ( $a$ ,  $b$ ,  $c$ ) principal inertial axes, with a vector pointing in the  $C_2$  ( $\equiv b$ ) symmetry axis direction.

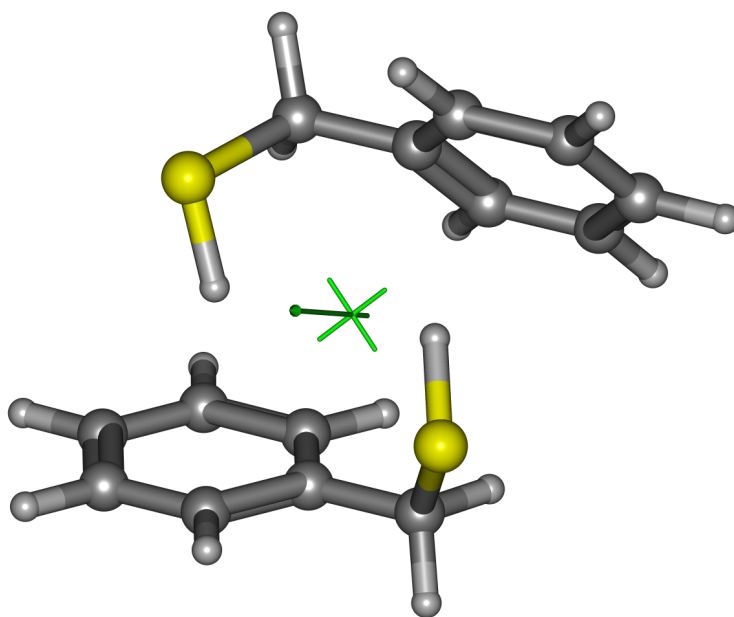

**Figure S7.** A comparison of the NCI Plots for isomers 1 ( $G'G'-G'G'-Lp+ = GG-GG-Lp-$ , upper panel) and 2 ( $G'G'-G'G'-Lp- = GG-GG-Lp+$ , lower panel) of the benzyl mercaptan dimer.

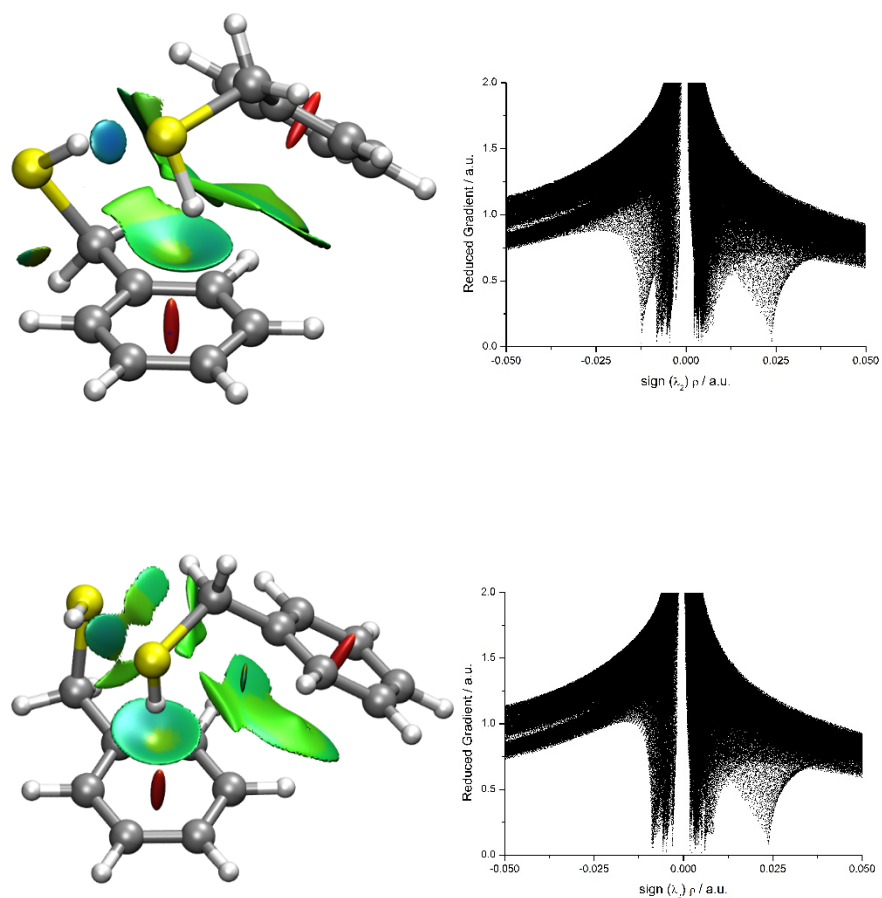



**Table S1.** Rotational parameters of benzyl mercaptan.

|                                                             | Conformer GG                                                                       |                |                     |
|-------------------------------------------------------------|------------------------------------------------------------------------------------|----------------|---------------------|
|                                                             | 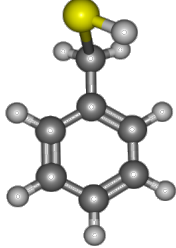 |                |                     |
|                                                             | Experiment <sup>a</sup>                                                            |                | Theory <sup>b</sup> |
|                                                             | $v=0$                                                                              | $v=1$          |                     |
| $A$ / MHz <sup>c</sup>                                      | 4167.4584(15) <sup>g</sup>                                                         | 4167.7017(15)  | 4185.0              |
| $B$ / MHz                                                   | 1001.61056(41)                                                                     | 1001.59720(36) | 1000.6              |
| $C$ / MHz                                                   | 891.69084(39)                                                                      | 891.65660(37)  | 891.0               |
| $D_J$ / kHz                                                 | 0.1550(41)                                                                         |                | 0.127               |
| $D_{JK}$ / kHz <sup>d</sup>                                 | 2.506(22)                                                                          |                | 1.809               |
| $D_K$ / kHz                                                 | 0.288(77)                                                                          |                | 1.726               |
| $d_1$ / kHz                                                 | [0.0] <sup>h</sup>                                                                 |                | 0.0038              |
| $d_2$ / kHz                                                 | [0.0]                                                                              |                | 0.0048              |
| $\Delta E_{01}$ / MHz <sup>e</sup>                          | 2180.4879(35)                                                                      |                |                     |
| $F_{ab}$ / MHz                                              | 96.3332(14)                                                                        |                |                     |
| $F_{bc}$ / kHz                                              | 17.88461(23)                                                                       |                |                     |
| $\sigma$ / kHz                                              | 11.5                                                                               |                |                     |
| $N$                                                         | 102                                                                                |                |                     |
| $\mu_a$ / D                                                 |                                                                                    |                | 1.2                 |
| $\mu_b$ / D                                                 |                                                                                    |                | 0.6                 |
| $\mu_c$ / D                                                 |                                                                                    |                | 0.4                 |
| $\mu_{\text{TOTAL}}$ / D                                    |                                                                                    |                | 2.0                 |
| $\Delta E_{\text{ZPE}}$ / kJ mol <sup>-1</sup> <sup>f</sup> |                                                                                    |                | 0.0                 |
| $\Delta G$ / kJ mol <sup>-1</sup>                           |                                                                                    |                | 0.0                 |
| HS–C $\alpha$ Cipso / deg                                   |                                                                                    |                | 53.7                |
| SC $\alpha$ –CipsoCortho / deg                              |                                                                                    |                | 75.3                |

<sup>a</sup>Taken from *J. Phys. Chem. A*, **2019**, 123, 8435–8440. <sup>b</sup>B3LYP-D3(BJ)/def2-TZVP.

<sup>c</sup>Rotational constants for the first two torsional sub-states ( $A$ ,  $B$ ,  $C$ ). <sup>d</sup>Watson's S-reduction centrifugal distortion constants ( $D_J$ ,  $D_{JK}$ ,  $D_K$ ,  $d_1$ ,  $d_2$ ). <sup>e</sup>Energy difference between the first torsional substates ( $\Delta E_{01}$ ), Coriolis coupling parameters ( $F_{ab}$ ,  $F_{bc}$ ), standard error of the fit ( $\sigma$ ) and number of measured transitions ( $N$ ). <sup>f</sup>Electronic energies, Gibbs energy (298 K, 1 atm) and structural parameters. <sup>g</sup>Standard errors in parentheses in units of the last digit. <sup>h</sup>Fixed to zero.

**Table S2.** Atomic coordinates of benzyl mercaptan *gauche* GG.

| Atom <sup>a</sup> | <i>a</i> / Å | <i>b</i> / Å | <i>c</i> / Å |
|-------------------|--------------|--------------|--------------|
| C                 | -0.0169      | -0.1437      | -0.4479      |
| C                 | -0.7969      | -1.2538      | -0.1316      |
| C                 | -2.1177      | -1.1014      | 0.2762       |
| C                 | -2.6742      | 0.1672       | 0.3697       |
| C                 | -1.9029      | 1.2821       | 0.0542       |
| C                 | -0.5849      | 1.1268       | -0.3484      |
| H                 | -0.3675      | -2.2459      | -0.2079      |
| H                 | -2.7108      | -1.9742      | 0.5172       |
| H                 | -3.7024      | 0.2888       | 0.6846       |
| H                 | -2.3313      | 2.2739       | 0.1230       |
| H                 | 0.0172       | 1.9973       | -0.5785      |
| C                 | 1.4117       | -0.3190      | -0.8670      |
| H                 | 1.6641       | 0.3428       | -1.6958      |
| H                 | 1.6015       | -1.3418      | -1.1873      |
| S                 | 2.6251       | 0.1323       | 0.4408       |
| H                 | 2.1100       | -0.6585      | 1.3965       |

<sup>a</sup>Atomic coordinates in the principal axes system (a, b, c) according to B3LYP-D3(BJ)/def2-TZVP.

**Table S3.** Conformational search for the benzyl mercaptan dimer (B3LYP-D3(BJ)/def2-TZVP) and comparison with the experimental rotational parameters.

|                                                 | Experiment                 | 1         | 2         | 3           |
|-------------------------------------------------|----------------------------|-----------|-----------|-------------|
| Isomer                                          |                            | GG-GG-Lp- | GG-GG-Lp+ | G'G'-GG-Lp- |
| $A$ / MHz <sup>a</sup>                          | 490.79216(17) <sup>c</sup> | 498.41    | 535.19    | 510.98      |
| $B$ / MHz                                       | 344.12732(12)              | 352.92    | 332.27    | 340.02      |
| $C$ / MHz                                       | 317.21115(11)              | 325.95    | 302.16    | 320.98      |
| $D_J$ / kHz                                     | 0.03861(51)                | 0.0323    | 0.0667    | 0.0471      |
| $D_{JK}$ / kHz                                  | 0.0642(18)                 | 0.0584    | -0.1183   | -0.0064     |
| $D_K$ / kHz                                     | -0.0718(20)                | -0.0662   | 0.2012    | 0.0411      |
| $d_I$ / kHz                                     | -0.00375(33)               | -0.0026   | -0.0002   | -0.0028     |
| $d_2$ / kHz                                     | 0.00089(13)                | 0.0007    | -0.0007   | 0.0007      |
| $ \mu_a $ / D                                   | ++                         | 1.5       | 0.4       | 1.1         |
| $ \mu_b $ / D                                   | ++                         | 1.7       | 1.3       | 1.6         |
| $ \mu_c $ / D                                   | ++                         | 1.3       | 0.8       | 0.5         |
| HBond donor <sup>b</sup>                        |                            |           |           |             |
| HS-C $\alpha$ Cipso / deg                       |                            | -39.62    | -49.89    | 40.21       |
| SC $\alpha$ -CipsoCortho / deg                  |                            | -57.39    | -70.22    | 64.92       |
| HBond acceptor                                  |                            |           |           |             |
| HS-C $\alpha$ Cipso / deg                       |                            | -53.09    | -45.03    | -44.53      |
| SC $\alpha$ -CipsoCortho / deg                  |                            | -67.56    | -56.82    | -70.87      |
| $r(\text{S}\cdots\text{H})$ / Å                 |                            | 2.684     | 2.879     | 2.728       |
| $\angle(\text{S}-\text{H}\cdots\text{S})$ / deg |                            | 164.81    | 138.54    | 160.91      |
| $r(\text{S}-\text{H}\cdots\text{centroid})$ / Å |                            | 2.527     | 2.408     | 2.558       |
| $\Delta E$ / kJ mol <sup>-1</sup> <sup>c</sup>  |                            | 0.0       | 1.8       | 3.3         |
| $\Delta G$ / kJ mol <sup>-1</sup>               |                            | 0.7       | 0.0       | 1.8         |
| $E_c$ / kJ mol <sup>-1</sup>                    |                            | -41.3     | -38.2     | -36.7       |
| $\Delta E_c$ / kJ mol <sup>-1</sup>             |                            | 0.0       | 3.1       | 4.6         |
| $N$ <sup>d</sup>                                | 337                        |           |           |             |
| $\sigma$ / kHz                                  | 8.5                        |           |           |             |

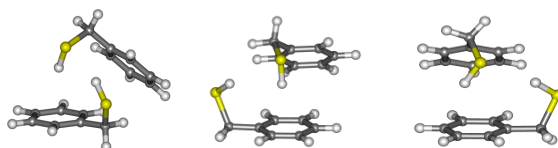

<sup>a</sup>Rotational constants ( $A$ ,  $B$ ,  $C$ ), Watson's S-reduction centrifugal distortion constants ( $D_J$ ,  $D_{JK}$ ,  $D_K$ ,  $d_I$ ,  $d_2$ ) and electric dipole moments ( $\mu_\alpha$ ,  $\alpha = a, b, c$ ). <sup>b</sup>Structural parameters of the dimer. <sup>c</sup>Relative electronic energies ( $\Delta E$ ) with zero-point correction, Gibbs energy ( $\Delta G$ , 298K, 1 atm), complexation energies ( $E_c$ ) and relative complexation energies ( $\Delta E_c$ ). <sup>d</sup>Number of transitions ( $N$ ) and rms deviation ( $\sigma$ ) of the fit. <sup>e</sup>Standard errors in units of the last digit.

**Table S3.** Continued.

|                                                 | 4                                                                                   | 5                                                                                   | 6                                                                                     | 7                                                                                     |
|-------------------------------------------------|-------------------------------------------------------------------------------------|-------------------------------------------------------------------------------------|---------------------------------------------------------------------------------------|---------------------------------------------------------------------------------------|
| Isomer                                          | GG-GG- $\pi\pi$                                                                     | GG-GG- $\pi$                                                                        | GG-G'G'                                                                               | G'G'-G'G'                                                                             |
| $A$ / MHz <sup>a</sup>                          | 578.49                                                                              | 500.52                                                                              | 510.75                                                                                | 540.01                                                                                |
| $B$ / MHz                                       | 336.90                                                                              | 377.60                                                                              | 342.43                                                                                | 313.16                                                                                |
| $C$ / MHz                                       | 279.49                                                                              | 260.22                                                                              | 321.26                                                                                | 239.80                                                                                |
| $D_J$ / kHz                                     | 0.0444                                                                              | 0.0926                                                                              | 0.0873                                                                                | 0.0648                                                                                |
| $D_{JK}$ / kHz                                  | -0.1414                                                                             | -0.1114                                                                             | 0.3314                                                                                | -0.1205                                                                               |
| $D_K$ / kHz                                     | 0.4325                                                                              | 0.0303                                                                              | -0.0658                                                                               | 0.2118                                                                                |
| $d_I$ / kHz                                     | -0.0061                                                                             | 0.0261                                                                              | -0.0075                                                                               | -0.0120                                                                               |
| $d_2$ / kHz                                     | -0.0018                                                                             | 0.0075                                                                              | 0.0041                                                                                | -0.0021                                                                               |
| $ \mu_a $ / D                                   | 0.0                                                                                 | 0.1                                                                                 | 0.7                                                                                   | 0.3                                                                                   |
| $ \mu_b $ / D                                   | 0.0                                                                                 | 0.1                                                                                 | 0.0                                                                                   | 1.9                                                                                   |
| $ \mu_c $ / D                                   | 2.2                                                                                 | 0.4                                                                                 | 1.6                                                                                   | 0.2                                                                                   |
| HBond donor <sup>b</sup>                        |                                                                                     |                                                                                     |                                                                                       |                                                                                       |
| HS-C $\alpha$ Cipso / deg                       | -61.44                                                                              | 60.60                                                                               | -57.58                                                                                | -49.39                                                                                |
| SC $\alpha$ -CipsoCortho / deg                  | -58.80                                                                              | 51.35                                                                               | -60.79                                                                                | -84.71                                                                                |
| HBond acceptor                                  |                                                                                     |                                                                                     |                                                                                       |                                                                                       |
| HS-C $\alpha$ Cipso / deg                       | -61.44                                                                              | 60.37                                                                               | 63.43                                                                                 | -64.14                                                                                |
| SC $\alpha$ -CipsoCortho / deg                  | -58.80                                                                              | 73.21                                                                               | 87.41                                                                                 | -81.45                                                                                |
| $r(\text{S}\cdots\text{H})$ / Å                 |                                                                                     |                                                                                     | 2.797                                                                                 | 2.658                                                                                 |
| $\angle(\text{S}-\text{H}\cdots\text{S})$ / deg |                                                                                     |                                                                                     | 162.56                                                                                | 154.84                                                                                |
| $r(\text{S}-\text{H}\cdots\text{centroid})$ / Å | 2.521                                                                               | 2.482                                                                               |                                                                                       |                                                                                       |
|                                                 | 2.520                                                                               | 2.469                                                                               |                                                                                       |                                                                                       |
| $\Delta E$ / kJ mol <sup>-1</sup> <sup>c</sup>  | 4.4                                                                                 | 4.6                                                                                 | 5.5                                                                                   | 6.8                                                                                   |
| $\Delta G$ / kJ mol <sup>-1</sup>               | 1.0                                                                                 | 1.5                                                                                 | 0.1                                                                                   | 2.4                                                                                   |
| $E_c$ / kJ mol <sup>-1</sup>                    | -34.81                                                                              | -35.65                                                                              | -33.39                                                                                | -32.55                                                                                |
| $\Delta E_c$ / kJ mol <sup>-1</sup>             | 6.44                                                                                | 5.61                                                                                | 7.87                                                                                  | 8.70                                                                                  |
|                                                 | 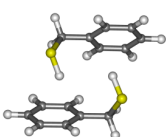 |  |  |  |

<sup>a</sup>Rotational constants ( $A$ ,  $B$ ,  $C$ ), Watson's S-reduction centrifugal distortion constants ( $D_J$ ,  $D_{JK}$ ,  $D_K$ ,  $d_I$ ,  $d_2$ ) and electric dipole moments ( $\mu_\alpha$ ,  $\alpha = a, b, c$ ). <sup>b</sup>Structural parameters of the dimer. <sup>c</sup>Relative electronic energies ( $\Delta E$ ) with zero-point correction, Gibbs energy ( $\Delta G$ , 298K, 1 atm), complexation energies ( $E_c$ ) and relative complexation energies ( $\Delta E_c$ ).

**Table S3.** Continued.

|                                             | 8                                                                                   | 9                                                                                   | 10                                                                                   | 11                                                                                    |
|---------------------------------------------|-------------------------------------------------------------------------------------|-------------------------------------------------------------------------------------|--------------------------------------------------------------------------------------|---------------------------------------------------------------------------------------|
| Isomer                                      | G'G'-GG                                                                             | GG-GG                                                                               | GG-G'G'                                                                              | GG-G'G'                                                                               |
| <i>A</i> / MHz <sup>[a]</sup>               | 474.03                                                                              | 462.48                                                                              | 466.32                                                                               | 465.46                                                                                |
| <i>B</i> / MHz                              | 346.66                                                                              | 361.47                                                                              | 400.86                                                                               | 357.27                                                                                |
| <i>C</i> / MHz                              | 258.85                                                                              | 238.73                                                                              | 270.71                                                                               | 237.28                                                                                |
| <i>D<sub>J</sub></i> / kHz                  | 0.1701                                                                              | 0.0584                                                                              | 0.0858                                                                               | 0.0461                                                                                |
| <i>D<sub>JK</sub></i> / kHz                 | -0.2747                                                                             | -0.0798                                                                             | -0.1231                                                                              | -0.0540                                                                               |
| <i>D<sub>K</sub></i> / kHz                  | 0.1359                                                                              | 0.0324                                                                              | 0.0701                                                                               | 0.0181                                                                                |
| <i>d<sub>1</sub></i> / kHz                  | -0.0347                                                                             | -0.0072                                                                             | 0.0159                                                                               | -0.0014                                                                               |
| <i>d<sub>2</sub></i> / kHz                  | 0.0258                                                                              | 0.0005                                                                              | 0.0184                                                                               | 0.0043                                                                                |
| $ \mu_a $ / D                               | 1.0                                                                                 | 0.0                                                                                 | 0.8                                                                                  | 0.0                                                                                   |
| $ \mu_b $ / D                               | 0.7                                                                                 | 0.0                                                                                 | 1.9                                                                                  | 0.0                                                                                   |
| $ \mu_c $ / D                               | 1.8                                                                                 | 1.3                                                                                 | 0.7                                                                                  | 0.0                                                                                   |
| HBond donor                                 |                                                                                     |                                                                                     |                                                                                      |                                                                                       |
| HS-C $\alpha$ Cipso / deg                   | -59.37                                                                              | 55.18                                                                               | 46.51                                                                                | -55.26                                                                                |
| SC $\alpha$ -CipsoCortho / deg              | -71.38                                                                              | 65.43                                                                               | 84.25                                                                                | -64.59                                                                                |
| HBond acceptor                              |                                                                                     |                                                                                     |                                                                                      |                                                                                       |
| HS-C $\alpha$ Cipso / deg                   | 56.10                                                                               | 55.19                                                                               | -64.68                                                                               | 55.25                                                                                 |
| SC $\alpha$ -CipsoCortho / deg              | 71.56                                                                               | 65.71                                                                               | -93.96                                                                               | 64.73                                                                                 |
| <i>r</i> (S $\cdots$ H) / Å                 |                                                                                     |                                                                                     | 2.690                                                                                |                                                                                       |
| $\angle$ (S-H $\cdots$ S) / deg             |                                                                                     |                                                                                     | 176.46                                                                               |                                                                                       |
| <i>r</i> (S-H $\cdots$ centroid) / Å        | 2.559                                                                               | 2.554                                                                               |                                                                                      |                                                                                       |
|                                             | 2.647                                                                               | 2.552                                                                               |                                                                                      |                                                                                       |
| $\Delta E$ / kJ mol <sup>-1</sup> [c]       | 8.0                                                                                 | 9.0                                                                                 | 9.2                                                                                  | 9.2                                                                                   |
| $\Delta G$ / kJ mol <sup>-1</sup>           | 0.0                                                                                 | 3.5                                                                                 | 5.3                                                                                  | 3.0                                                                                   |
| <i>E<sub>c</sub></i> / kJ mol <sup>-1</sup> | -30.46                                                                              | -30.46                                                                              | -30.29                                                                               | -30.08                                                                                |
| $\Delta E_c$ / kJ mol <sup>-1</sup>         | 10.79                                                                               | 10.79                                                                               | 10.96                                                                                | 11.17                                                                                 |
|                                             | 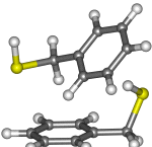 |  |  |  |

<sup>a</sup>Rotational constants (*A*, *B*, *C*), Watson's S-reduction centrifugal distortion constants (*D<sub>J</sub>*, *D<sub>JK</sub>*, *D<sub>K</sub>*, *d<sub>1</sub>*, *d<sub>2</sub>*) and electric dipole moments ( $\mu_\alpha$ ,  $\alpha$  = a, b, c). <sup>b</sup>Structural parameters of the dimer. <sup>c</sup>Relative electronic energies ( $\Delta E$ ) with zero-point correction, Gibbs energy ( $\Delta G$ , 298K, 1 atm), complexation energies (*E<sub>c</sub>*) and relative complexation energies ( $\Delta E_c$ ).

**Table S4.** List of observed rotational transitions of the benzyl mercaptan dimer GG-GG-Lp- and (observed – calculated, o-c) residuals for the fit of Table 1 (all units in MHz).

|    | $J'$ | $K_{-l}'$ | $K_{+l}'$ | $J''$ | $K_{-l}''$ | $K_{+l}''$ | Freq. / MHz | o-c / MHz |
|----|------|-----------|-----------|-------|------------|------------|-------------|-----------|
| 1  | 5    | 1         | 4         | 4     | 2          | 3          | 3003.2615   | 0.0014    |
| 2  | 15   | 10        | 5         | 15    | 9          | 6          | 3014.5209   | 0.0033    |
| 3  | 15   | 10        | 6         | 15    | 9          | 6          | 3014.5209   | 0.0033    |
| 4  | 15   | 10        | 6         | 15    | 9          | 7          | 3014.5209   | 0.0023    |
| 5  | 15   | 10        | 5         | 15    | 9          | 7          | 3014.5209   | 0.0023    |
| 6  | 14   | 10        | 4         | 14    | 9          | 5          | 3019.1913   | -0.0132   |
| 7  | 14   | 10        | 5         | 14    | 9          | 5          | 3019.1913   | -0.0132   |
| 8  | 14   | 10        | 4         | 14    | 9          | 6          | 3019.1913   | -0.0135   |
| 9  | 14   | 10        | 5         | 14    | 9          | 6          | 3019.1913   | -0.0135   |
| 10 | 13   | 10        | 3         | 13    | 9          | 4          | 3023.0051   | 0.0021    |
| 11 | 13   | 10        | 4         | 13    | 9          | 4          | 3023.0051   | 0.0021    |
| 12 | 13   | 10        | 3         | 13    | 9          | 5          | 3023.0051   | 0.0020    |
| 13 | 13   | 10        | 4         | 13    | 9          | 5          | 3023.0051   | 0.0020    |
| 14 | 12   | 10        | 2         | 12    | 9          | 3          | 3026.0395   | 0.0009    |
| 15 | 12   | 10        | 2         | 12    | 9          | 4          | 3026.0395   | 0.0009    |
| 16 | 12   | 10        | 3         | 12    | 9          | 3          | 3026.0395   | 0.0009    |
| 17 | 12   | 10        | 3         | 12    | 9          | 4          | 3026.0395   | 0.0009    |
| 18 | 11   | 10        | 1         | 11    | 9          | 2          | 3028.4302   | 0.0055    |
| 19 | 11   | 10        | 1         | 11    | 9          | 3          | 3028.4302   | 0.0055    |
| 20 | 11   | 10        | 2         | 11    | 9          | 2          | 3028.4302   | 0.0055    |
| 21 | 11   | 10        | 2         | 11    | 9          | 3          | 3028.4302   | 0.0055    |
| 22 | 4    | 2         | 3         | 3     | 1          | 2          | 3044.5916   | 0.0067    |
| 23 | 4    | 2         | 2         | 3     | 1          | 2          | 3092.0905   | 0.0037    |
| 24 | 5    | 0         | 5         | 4     | 1          | 4          | 3185.8517   | -0.0026   |
| 25 | 4    | 2         | 3         | 3     | 1          | 3          | 3205.8200   | 0.0063    |
| 26 | 5    | 1         | 5         | 4     | 1          | 4          | 3227.1334   | 0.0039    |
| 27 | 5    | 0         | 5         | 4     | 0          | 4          | 3250.8942   | -0.0060   |
| 28 | 4    | 2         | 2         | 3     | 1          | 3          | 3253.3122   | -0.0034   |
| 29 | 5    | 1         | 5         | 4     | 0          | 4          | 3292.1765   | 0.0011    |
| 30 | 5    | 2         | 4         | 4     | 2          | 3          | 3299.1824   | 0.0032    |
| 31 | 5    | 3         | 3         | 4     | 3          | 2          | 3315.7372   | 0.0020    |
| 32 | 5    | 3         | 2         | 4     | 3          | 1          | 3321.1660   | 0.0044    |
| 33 | 5    | 2         | 3         | 4     | 2          | 2          | 3354.8164   | 0.0026    |
| 34 | 5    | 1         | 4         | 4     | 1          | 3          | 3356.2760   | -0.0030   |
| 35 | 4    | 3         | 2         | 3     | 2          | 1          | 3437.4243   | -0.0059   |
| 36 | 4    | 3         | 1         | 3     | 2          | 1          | 3439.2828   | -0.0005   |
| 37 | 6    | 0         | 6         | 5     | 1          | 4          | 3445.8361   | 0.0015    |
| 38 | 4    | 3         | 2         | 3     | 2          | 2          | 3453.9662   | -0.0039   |
| 39 | 4    | 3         | 1         | 3     | 2          | 2          | 3455.8224   | -0.0008   |
| 40 | 6    | 1         | 5         | 5     | 2          | 3          | 3615.2616   | -0.0016   |
| 41 | 5    | 2         | 4         | 4     | 1          | 3          | 3652.1950   | -0.0031   |
| 42 | 6    | 1         | 5         | 5     | 2          | 4          | 3718.4073   | 0.0076    |
| 43 | 7    | 2         | 6         | 6     | 3          | 3          | 3727.7143   | 0.0075    |
| 44 | 7    | 2         | 6         | 6     | 3          | 4          | 3748.8557   | 0.0072    |
| 45 | 5    | 2         | 3         | 4     | 1          | 3          | 3755.3324   | -0.0022   |
| 46 | 4    | 4         | 1         | 3     | 3          | 0          | 3766.6115   | 0.0317    |
| 47 | 4    | 4         | 0         | 3     | 3          | 0          | 3766.6115   | 0.0142    |
| 48 | 4    | 4         | 1         | 3     | 3          | 1          | 3766.8209   | -0.0259   |
| 49 | 4    | 4         | 0         | 3     | 3          | 1          | 3766.8209   | -0.0434   |
| 50 | 6    | 0         | 6         | 5     | 1          | 5          | 3842.2952   | 0.0053    |
| 51 | 6    | 0         | 6         | 5     | 0          | 5          | 3883.5613   | -0.0036   |
| 52 | 6    | 1         | 6         | 5     | 0          | 5          | 3907.9721   | -0.0036   |
| 53 | 5    | 2         | 4         | 4     | 1          | 4          | 3919.5039   | 0.0001    |

|     |   |   |   |   |   |   |           |         |
|-----|---|---|---|---|---|---|-----------|---------|
| 54  | 7 | 0 | 7 | 6 | 1 | 5 | 3946.7814 | 0.0076  |
| 55  | 6 | 2 | 5 | 5 | 2 | 4 | 3952.9727 | 0.0031  |
| 56  | 6 | 5 | 2 | 5 | 5 | 1 | 3976.4830 | 0.0084  |
| 57  | 6 | 5 | 1 | 5 | 5 | 0 | 3976.4830 | -0.0018 |
| 58  | 6 | 4 | 3 | 5 | 4 | 2 | 3979.2657 | -0.0042 |
| 59  | 6 | 4 | 2 | 5 | 4 | 1 | 3979.8814 | -0.0069 |
| 60  | 6 | 3 | 4 | 5 | 3 | 3 | 3980.0476 | 0.0026  |
| 61  | 6 | 1 | 5 | 5 | 1 | 4 | 4014.3151 | -0.0037 |
| 62  | 5 | 2 | 3 | 4 | 1 | 4 | 4022.6428 | 0.0025  |
| 63  | 7 | 2 | 5 | 6 | 3 | 3 | 4026.6949 | -0.0046 |
| 64  | 6 | 2 | 4 | 5 | 2 | 3 | 4036.7867 | 0.0015  |
| 65  | 7 | 2 | 5 | 6 | 3 | 4 | 4047.8348 | -0.0064 |
| 66  | 5 | 3 | 3 | 4 | 2 | 2 | 4079.4920 | -0.0052 |
| 67  | 5 | 3 | 2 | 4 | 2 | 2 | 4086.7772 | 0.0003  |
| 68  | 5 | 3 | 3 | 4 | 2 | 3 | 4126.9947 | -0.0045 |
| 69  | 5 | 3 | 2 | 4 | 2 | 3 | 4134.2751 | -0.0036 |
| 70  | 8 | 3 | 6 | 7 | 4 | 3 | 4187.6106 | 0.0057  |
| 71  | 8 | 3 | 6 | 7 | 4 | 4 | 4190.4011 | 0.0018  |
| 72  | 7 | 1 | 6 | 6 | 2 | 4 | 4242.4017 | -0.0094 |
| 73  | 6 | 2 | 5 | 5 | 1 | 4 | 4248.8924 | 0.0037  |
| 74  | 8 | 3 | 5 | 7 | 4 | 3 | 4289.2450 | -0.0026 |
| 75  | 8 | 3 | 5 | 7 | 4 | 4 | 4292.0301 | -0.0118 |
| 76  | 8 | 2 | 7 | 7 | 3 | 4 | 4306.5833 | 0.0101  |
| 77  | 8 | 2 | 7 | 7 | 3 | 5 | 4356.6804 | 0.0048  |
| 78  | 5 | 4 | 2 | 4 | 3 | 1 | 4427.7774 | -0.0076 |
| 79  | 5 | 4 | 1 | 4 | 3 | 1 | 4427.9448 | 0.0031  |
| 80  | 7 | 1 | 6 | 6 | 2 | 5 | 4429.3670 | 0.0038  |
| 81  | 5 | 4 | 2 | 4 | 3 | 2 | 4429.6300 | -0.0080 |
| 82  | 5 | 4 | 1 | 4 | 3 | 2 | 4429.7914 | -0.0033 |
| 83  | 8 | 0 | 8 | 7 | 1 | 6 | 4430.2471 | 0.0101  |
| 84  | 6 | 2 | 4 | 5 | 1 | 4 | 4435.8365 | -0.0041 |
| 85  | 6 | 1 | 5 | 5 | 0 | 5 | 4452.0459 | -0.0031 |
| 86  | 7 | 0 | 7 | 6 | 1 | 6 | 4490.8489 | 0.0018  |
| 87  | 7 | 1 | 7 | 6 | 1 | 6 | 4504.5425 | -0.0045 |
| 88  | 7 | 0 | 7 | 6 | 0 | 6 | 4515.2606 | 0.0026  |
| 89  | 7 | 1 | 7 | 6 | 0 | 6 | 4528.9541 | -0.0038 |
| 90  | 7 | 2 | 6 | 6 | 2 | 5 | 4603.7446 | 0.0007  |
| 91  | 7 | 6 | 2 | 6 | 6 | 1 | 4638.8036 | 0.0000  |
| 92  | 7 | 6 | 1 | 6 | 6 | 0 | 4638.8036 | -0.0006 |
| 93  | 7 | 5 | 3 | 6 | 5 | 2 | 4641.3749 | 0.0295  |
| 94  | 7 | 5 | 2 | 6 | 5 | 1 | 4641.3749 | -0.0266 |
| 95  | 7 | 3 | 5 | 6 | 3 | 4 | 4643.5319 | 0.0044  |
| 96  | 6 | 2 | 5 | 5 | 1 | 5 | 4645.3486 | 0.0046  |
| 97  | 7 | 4 | 4 | 6 | 4 | 3 | 4645.3486 | -0.0016 |
| 98  | 7 | 4 | 3 | 6 | 4 | 2 | 4647.3668 | -0.0027 |
| 99  | 7 | 1 | 6 | 6 | 1 | 5 | 4663.9357 | 0.0026  |
| 100 | 7 | 3 | 4 | 6 | 3 | 3 | 4672.4861 | -0.0019 |
| 101 | 6 | 3 | 4 | 5 | 2 | 3 | 4704.7221 | -0.0064 |
| 102 | 7 | 2 | 5 | 6 | 2 | 4 | 4715.7847 | 0.0000  |
| 103 | 6 | 3 | 3 | 5 | 2 | 3 | 4725.8724 | 0.0021  |
| 104 | 8 | 2 | 6 | 7 | 3 | 4 | 4743.4250 | 0.0027  |
| 105 | 5 | 5 | 0 | 4 | 4 | 0 | 4748.3134 | 0.0006  |
| 106 | 5 | 5 | 1 | 4 | 4 | 1 | 4748.3134 | -0.0158 |
| 107 | 5 | 5 | 0 | 4 | 4 | 1 | 4748.3134 | -0.0168 |
| 108 | 5 | 5 | 1 | 4 | 4 | 0 | 4748.3134 | 0.0016  |
| 109 | 8 | 2 | 6 | 7 | 3 | 5 | 4793.5157 | -0.0089 |
| 110 | 6 | 3 | 4 | 5 | 2 | 4 | 4807.8591 | -0.0058 |
| 111 | 6 | 3 | 3 | 5 | 2 | 4 | 4829.0107 | 0.0040  |
| 112 | 8 | 1 | 7 | 7 | 2 | 5 | 4831.2734 | -0.0018 |
| 113 | 6 | 2 | 4 | 5 | 1 | 5 | 4832.3096 | 0.0137  |

|     |    |   |    |   |   |   |           |         |
|-----|----|---|----|---|---|---|-----------|---------|
| 114 | 9  | 3 | 7  | 8 | 4 | 4 | 4834.7929 | 0.0177  |
| 115 | 7  | 2 | 6  | 6 | 1 | 5 | 4838.3163 | 0.0025  |
| 116 | 9  | 2 | 8  | 8 | 3 | 5 | 4845.5509 | -0.0103 |
| 117 | 9  | 2 | 8  | 8 | 3 | 6 | 4947.1922 | -0.0117 |
| 118 | 9  | 3 | 6  | 8 | 4 | 4 | 5016.4674 | -0.0199 |
| 119 | 9  | 3 | 6  | 8 | 4 | 5 | 5024.6695 | 0.0125  |
| 120 | 6  | 4 | 3  | 5 | 3 | 2 | 5085.8942 | 0.0007  |
| 121 | 6  | 4 | 2  | 5 | 3 | 2 | 5086.6639 | -0.0045 |
| 122 | 6  | 4 | 3  | 5 | 3 | 3 | 5093.1698 | -0.0032 |
| 123 | 6  | 4 | 2  | 5 | 3 | 3 | 5093.9489 | 0.0009  |
| 124 | 8  | 1 | 7  | 7 | 2 | 6 | 5130.2654 | -0.0026 |
| 125 | 8  | 0 | 8  | 7 | 1 | 7 | 5133.6896 | -0.0066 |
| 126 | 7  | 2 | 5  | 6 | 1 | 5 | 5137.3045 | -0.0020 |
| 127 | 8  | 1 | 8  | 7 | 1 | 7 | 5141.0997 | 0.0024  |
| 128 | 8  | 0 | 8  | 7 | 0 | 7 | 5147.3971 | 0.0008  |
| 129 | 8  | 1 | 8  | 7 | 0 | 7 | 5154.7984 | 0.0011  |
| 130 | 7  | 1 | 6  | 6 | 0 | 6 | 5232.4199 | 0.0026  |
| 131 | 8  | 2 | 7  | 7 | 2 | 6 | 5251.3574 | 0.0028  |
| 132 | 10 | 4 | 6  | 9 | 5 | 4 | 5273.3971 | -0.0101 |
| 133 | 10 | 4 | 6  | 9 | 5 | 5 | 5274.3958 | -0.0091 |
| 134 | 8  | 7 | 2  | 7 | 7 | 1 | 5301.1412 | -0.0136 |
| 135 | 8  | 7 | 1  | 7 | 7 | 0 | 5301.1412 | -0.0136 |
| 136 | 8  | 6 | 3  | 7 | 6 | 2 | 5303.4211 | 0.0017  |
| 137 | 8  | 6 | 2  | 7 | 6 | 1 | 5303.4211 | -0.0026 |
| 138 | 10 | 1 | 10 | 9 | 2 | 8 | 5304.6487 | 0.0169  |
| 139 | 8  | 1 | 7  | 7 | 1 | 6 | 5304.6487 | 0.0000  |
| 140 | 8  | 3 | 6  | 7 | 3 | 5 | 5305.3427 | -0.0072 |
| 141 | 8  | 5 | 4  | 7 | 5 | 3 | 5307.1644 | -0.0050 |
| 142 | 8  | 5 | 3  | 7 | 5 | 2 | 5307.3872 | -0.0043 |
| 143 | 7  | 3 | 5  | 6 | 2 | 4 | 5311.4709 | 0.0000  |
| 144 | 8  | 4 | 5  | 7 | 4 | 4 | 5312.1987 | 0.0016  |
| 145 | 8  | 4 | 4  | 7 | 4 | 3 | 5317.5739 | 0.0015  |
| 146 | 10 | 2 | 9  | 9 | 3 | 6 | 5338.3431 | -0.0190 |
| 147 | 8  | 3 | 5  | 7 | 3 | 4 | 5356.8888 | -0.0015 |
| 148 | 7  | 3 | 4  | 6 | 2 | 4 | 5361.5681 | -0.0050 |
| 149 | 9  | 1 | 8  | 8 | 2 | 6 | 5380.2760 | 0.0083  |
| 150 | 7  | 2 | 6  | 6 | 1 | 6 | 5382.3903 | 0.0033  |
| 151 | 8  | 2 | 6  | 7 | 2 | 5 | 5389.2127 | 0.0018  |
| 152 | 6  | 5 | 2  | 5 | 4 | 1 | 5410.6007 | 0.1072  |
| 153 | 6  | 5 | 1  | 5 | 4 | 1 | 5410.6007 | 0.0959  |
| 154 | 6  | 5 | 2  | 5 | 4 | 2 | 5410.6007 | -0.0493 |
| 155 | 6  | 5 | 1  | 5 | 4 | 2 | 5410.6007 | -0.0607 |
| 156 | 8  | 2 | 7  | 7 | 1 | 6 | 5425.7348 | -0.0003 |
| 157 | 9  | 2 | 7  | 8 | 3 | 5 | 5441.7897 | 0.0041  |
| 158 | 10 | 3 | 8  | 9 | 4 | 5 | 5464.2155 | 0.0053  |
| 159 | 10 | 3 | 8  | 9 | 4 | 6 | 5484.6500 | -0.0014 |
| 160 | 7  | 3 | 5  | 6 | 2 | 5 | 5498.4157 | -0.0071 |
| 161 | 9  | 2 | 7  | 8 | 3 | 6 | 5543.4257 | -0.0026 |
| 162 | 7  | 3 | 4  | 6 | 2 | 5 | 5548.5234 | -0.0017 |
| 163 | 7  | 2 | 5  | 6 | 1 | 6 | 5681.3750 | -0.0047 |
| 164 | 6  | 6 | 0  | 5 | 5 | 0 | 5729.9000 | -0.0007 |
| 165 | 6  | 6 | 1  | 5 | 5 | 0 | 5729.9000 | -0.0006 |
| 166 | 6  | 6 | 1  | 5 | 5 | 1 | 5729.9000 | -0.0016 |
| 167 | 6  | 6 | 0  | 5 | 5 | 1 | 5729.9000 | -0.0017 |
| 168 | 7  | 4 | 4  | 6 | 3 | 3 | 5737.3353 | -0.0011 |
| 169 | 7  | 4 | 3  | 6 | 3 | 3 | 5740.1292 | -0.0016 |
| 170 | 7  | 4 | 4  | 6 | 3 | 4 | 5758.4762 | -0.0020 |
| 171 | 7  | 4 | 3  | 6 | 3 | 4 | 5761.2709 | -0.0016 |
| 172 | 9  | 0 | 9  | 8 | 1 | 8 | 5772.8719 | 0.0015  |
| 173 | 9  | 1 | 9  | 8 | 1 | 8 | 5776.7579 | 0.0006  |



|     |    |   |    |    |   |   |           |         |
|-----|----|---|----|----|---|---|-----------|---------|
| 174 | 9  | 0 | 9  | 8  | 0 | 8 | 5780.2723 | 0.0008  |
| 175 | 9  | 1 | 9  | 8  | 0 | 8 | 5784.1599 | 0.0016  |
| 176 | 9  | 1 | 8  | 8  | 2 | 7 | 5817.1198 | 0.0030  |
| 177 | 8  | 2 | 6  | 7  | 1 | 6 | 5862.5846 | 0.0002  |
| 178 | 9  | 2 | 8  | 8  | 2 | 7 | 5895.8790 | 0.0004  |
| 179 | 8  | 3 | 6  | 7  | 2 | 5 | 5901.0342 | -0.0020 |
| 180 | 9  | 1 | 8  | 8  | 1 | 7 | 5938.2024 | -0.0008 |
| 181 | 9  | 8 | 1  | 8  | 8 | 0 | 5963.5282 | 0.0135  |
| 182 | 9  | 8 | 2  | 8  | 8 | 1 | 5963.5282 | 0.0135  |
| 183 | 9  | 3 | 7  | 8  | 3 | 6 | 5964.7421 | -0.0005 |
| 184 | 9  | 7 | 3  | 8  | 7 | 2 | 5965.5889 | 0.0026  |
| 185 | 9  | 7 | 2  | 8  | 7 | 1 | 5965.5889 | 0.0022  |
| 186 | 9  | 6 | 4  | 8  | 6 | 3 | 5968.8228 | 0.0095  |
| 187 | 9  | 6 | 3  | 8  | 6 | 2 | 5968.8228 | -0.0110 |
| 188 | 9  | 5 | 5  | 8  | 5 | 4 | 5974.0271 | 0.0047  |
| 189 | 9  | 5 | 4  | 8  | 5 | 3 | 5974.7323 | 0.0020  |
| 190 | 9  | 4 | 6  | 8  | 4 | 5 | 5979.3893 | 0.0022  |
| 191 | 9  | 4 | 5  | 8  | 4 | 4 | 5991.6619 | 0.0032  |
| 192 | 8  | 3 | 5  | 7  | 2 | 5 | 6002.6789 | 0.0000  |
| 193 | 9  | 2 | 8  | 8  | 1 | 7 | 6016.9657 | 0.0007  |
| 194 | 8  | 1 | 7  | 7  | 0 | 7 | 6021.8079 | -0.0001 |
| 195 | 9  | 3 | 6  | 8  | 3 | 5 | 6044.8152 | 0.0031  |
| 196 | 9  | 2 | 7  | 8  | 2 | 6 | 6055.2540 | 0.0003  |
| 197 | 11 | 3 | 9  | 10 | 4 | 6 | 6067.2722 | -0.0010 |
| 198 | 7  | 5 | 3  | 6  | 4 | 2 | 6071.9911 | 0.0406  |
| 199 | 7  | 5 | 2  | 6  | 4 | 2 | 6071.9911 | -0.0269 |
| 200 | 7  | 5 | 3  | 6  | 4 | 3 | 6072.7545 | 0.0291  |
| 201 | 7  | 5 | 2  | 6  | 4 | 3 | 6072.7545 | -0.0384 |
| 202 | 10 | 2 | 8  | 9  | 3 | 6 | 6109.3442 | 0.0053  |
| 203 | 11 | 3 | 9  | 10 | 4 | 7 | 6112.3660 | -0.0180 |
| 204 | 8  | 2 | 7  | 7  | 1 | 7 | 6129.1956 | 0.0011  |
| 205 | 8  | 3 | 6  | 7  | 2 | 6 | 6200.0285 | -0.0005 |
| 206 | 10 | 2 | 8  | 9  | 3 | 7 | 6291.0537 | 0.0027  |
| 207 | 8  | 3 | 5  | 7  | 2 | 6 | 6301.6712 | -0.0005 |
| 208 | 8  | 4 | 5  | 7  | 3 | 4 | 6377.0441 | -0.0014 |
| 209 | 11 | 1 | 10 | 10 | 2 | 8 | 6377.5971 | 0.0091  |
| 210 | 8  | 4 | 4  | 7  | 3 | 4 | 6385.2135 | -0.0016 |
| 211 | 7  | 6 | 2  | 6  | 5 | 1 | 6392.2237 | 0.0044  |
| 212 | 7  | 6 | 1  | 6  | 5 | 1 | 6392.2237 | 0.0037  |
| 213 | 7  | 6 | 2  | 6  | 5 | 2 | 6392.2237 | -0.0068 |
| 214 | 7  | 6 | 1  | 6  | 5 | 2 | 6392.2237 | -0.0076 |
| 215 | 10 | 0 | 10 | 9  | 1 | 9 | 6409.8507 | -0.0017 |
| 216 | 10 | 1 | 10 | 9  | 1 | 9 | 6411.8499 | -0.0003 |
| 217 | 10 | 0 | 10 | 9  | 0 | 9 | 6413.7382 | -0.0012 |
| 218 | 10 | 1 | 10 | 9  | 0 | 9 | 6415.7383 | 0.0012  |
| 219 | 8  | 4 | 5  | 7  | 3 | 5 | 6427.1475 | -0.0003 |
| 220 | 8  | 4 | 4  | 7  | 3 | 5 | 6435.3135 | -0.0039 |
| 221 | 9  | 3 | 7  | 8  | 2 | 6 | 6476.5693 | 0.0012  |
| 222 | 10 | 1 | 9  | 9  | 2 | 8 | 6489.1920 | 0.0009  |
| 223 | 10 | 2 | 9  | 9  | 2 | 8 | 6537.6126 | -0.0003 |
| 224 | 10 | 1 | 9  | 9  | 1 | 8 | 6567.9525 | -0.0003 |
| 225 | 9  | 2 | 7  | 8  | 1 | 7 | 6613.1891 | -0.0001 |
| 226 | 10 | 2 | 9  | 9  | 1 | 8 | 6616.3744 | -0.0003 |
| 227 | 10 | 3 | 8  | 9  | 3 | 7 | 6621.0959 | 0.0022  |
| 228 | 10 | 9 | 1  | 9  | 9 | 0 | 6625.8754 | 0.0021  |
| 229 | 10 | 9 | 2  | 9  | 9 | 1 | 6625.8754 | 0.0021  |
| 230 | 10 | 8 | 2  | 9  | 8 | 1 | 6627.8139 | 0.0036  |
| 231 | 10 | 8 | 3  | 9  | 8 | 2 | 6627.8139 | 0.0036  |
| 232 | 10 | 7 | 4  | 9  | 7 | 3 | 6630.6600 | 0.0048  |
| 233 | 10 | 7 | 3  | 9  | 7 | 2 | 6630.6600 | 0.0031  |

|     |    |    |    |    |    |    |           |         |
|-----|----|----|----|----|----|----|-----------|---------|
| 234 | 10 | 6  | 5  | 9  | 6  | 4  | 6635.0964 | 0.0127  |
| 235 | 10 | 6  | 4  | 9  | 6  | 3  | 6635.0964 | -0.0632 |
| 236 | 10 | 5  | 6  | 9  | 5  | 5  | 6641.9018 | 0.0001  |
| 237 | 10 | 5  | 5  | 9  | 5  | 4  | 6643.8320 | 0.0021  |
| 238 | 10 | 4  | 7  | 9  | 4  | 6  | 6646.2774 | 0.0002  |
| 239 | 9  | 3  | 6  | 8  | 2  | 6  | 6658.2804 | 0.0002  |
| 240 | 10 | 4  | 6  | 9  | 4  | 5  | 6670.9478 | 0.0010  |
| 241 | 7  | 7  | 0  | 6  | 6  | 0  | 6711.4711 | -0.0004 |
| 242 | 7  | 7  | 1  | 6  | 6  | 0  | 6711.4711 | -0.0004 |
| 243 | 7  | 7  | 0  | 6  | 6  | 1  | 6711.4711 | -0.0005 |
| 244 | 7  | 7  | 1  | 6  | 6  | 1  | 6711.4711 | -0.0005 |
| 245 | 10 | 2  | 8  | 9  | 2  | 7  | 6712.3680 | 0.0026  |
| 246 | 12 | 3  | 10 | 11 | 4  | 8  | 6723.6521 | -0.0105 |
| 247 | 8  | 5  | 4  | 7  | 4  | 3  | 6731.7504 | 0.0000  |
| 248 | 8  | 5  | 3  | 7  | 4  | 3  | 6732.0418 | 0.0017  |
| 249 | 10 | 3  | 7  | 9  | 3  | 6  | 6732.1948 | 0.0020  |
| 250 | 8  | 5  | 4  | 7  | 4  | 4  | 6734.5440 | -0.0007 |
| 251 | 8  | 5  | 3  | 7  | 4  | 4  | 6734.8363 | 0.0019  |
| 252 | 11 | 2  | 9  | 10 | 3  | 7  | 6736.6271 | -0.0073 |
| 253 | 9  | 1  | 8  | 8  | 0  | 8  | 6812.6083 | -0.0066 |
| 254 | 9  | 2  | 8  | 8  | 1  | 8  | 6883.9767 | 0.0010  |
| 255 | 9  | 3  | 7  | 8  | 2  | 7  | 6913.4201 | 0.0029  |
| 256 | 9  | 4  | 6  | 8  | 3  | 5  | 6999.5390 | -0.0030 |
| 257 | 9  | 4  | 5  | 8  | 3  | 5  | 7019.9815 | -0.0018 |
| 258 | 11 | 2  | 9  | 10 | 3  | 8  | 7029.4558 | 0.0101  |
| 259 | 10 | 3  | 8  | 9  | 2  | 7  | 7042.4135 | 0.0054  |
| 260 | 11 | 0  | 11 | 10 | 1  | 10 | 7045.5979 | 0.0042  |
| 261 | 11 | 1  | 11 | 10 | 1  | 10 | 7046.6029 | -0.0002 |
| 262 | 11 | 0  | 11 | 10 | 0  | 10 | 7047.5909 | -0.0005 |
| 263 | 11 | 1  | 11 | 10 | 0  | 10 | 7048.6010 | 0.0002  |
| 264 | 8  | 6  | 3  | 7  | 5  | 2  | 7054.2223 | -0.0147 |
| 265 | 8  | 6  | 2  | 7  | 5  | 2  | 7054.2223 | -0.0199 |
| 266 | 8  | 6  | 3  | 7  | 5  | 3  | 7054.3306 | 0.0260  |
| 267 | 8  | 6  | 2  | 7  | 5  | 3  | 7054.3306 | 0.0208  |
| 268 | 9  | 3  | 6  | 8  | 2  | 7  | 7095.1352 | 0.0058  |
| 269 | 9  | 4  | 6  | 8  | 3  | 6  | 7101.1851 | 0.0002  |
| 270 | 9  | 4  | 5  | 8  | 3  | 6  | 7121.6265 | 0.0004  |
| 271 | 11 | 1  | 10 | 10 | 2  | 9  | 7148.5627 | -0.0019 |
| 272 | 11 | 2  | 10 | 10 | 2  | 9  | 7177.0174 | 0.0000  |
| 273 | 11 | 1  | 10 | 10 | 1  | 9  | 7196.9882 | 0.0016  |
| 274 | 11 | 3  | 9  | 10 | 3  | 8  | 7274.0089 | -0.0008 |
| 275 | 11 | 10 | 1  | 10 | 10 | 0  | 7288.2200 | -0.0042 |
| 276 | 11 | 10 | 2  | 10 | 10 | 1  | 7288.2200 | -0.0042 |
| 277 | 11 | 9  | 2  | 10 | 9  | 1  | 7290.0757 | 0.0123  |
| 278 | 11 | 9  | 3  | 10 | 9  | 2  | 7290.0757 | 0.0123  |
| 279 | 11 | 8  | 4  | 10 | 8  | 3  | 7292.6484 | 0.0064  |
| 280 | 11 | 8  | 3  | 10 | 8  | 2  | 7292.6484 | 0.0062  |
| 281 | 11 | 7  | 5  | 10 | 7  | 4  | 7296.4523 | 0.0139  |
| 282 | 11 | 7  | 4  | 10 | 7  | 3  | 7296.4523 | 0.0068  |
| 283 | 11 | 6  | 5  | 10 | 6  | 4  | 7302.5626 | 0.0040  |
| 284 | 11 | 5  | 7  | 10 | 5  | 6  | 7310.6874 | 0.0084  |
| 285 | 11 | 4  | 8  | 10 | 4  | 7  | 7312.0753 | 0.0058  |
| 286 | 11 | 5  | 6  | 10 | 5  | 5  | 7315.3237 | 0.0058  |
| 287 | 13 | 3  | 11 | 12 | 4  | 9  | 7316.9676 | 0.0015  |
| 288 | 12 | 2  | 10 | 11 | 3  | 8  | 7318.5871 | 0.0059  |
| 289 | 10 | 3  | 7  | 9  | 2  | 7  | 7335.2196 | 0.0004  |
| 290 | 11 | 4  | 7  | 10 | 4  | 6  | 7356.3000 | 0.0046  |
| 291 | 11 | 2  | 9  | 10 | 2  | 8  | 7359.4913 | 0.0030  |
| 292 | 8  | 7  | 1  | 7  | 6  | 1  | 7373.8236 | 0.0012  |
| 293 | 8  | 7  | 2  | 7  | 6  | 1  | 7373.8236 | 0.0012  |

|     |    |   |    |    |   |    |           |         |
|-----|----|---|----|----|---|----|-----------|---------|
| 294 | 8  | 7 | 2  | 7  | 6 | 2  | 7373.8236 | 0.0005  |
| 295 | 8  | 7 | 1  | 7  | 6 | 2  | 7373.8236 | 0.0004  |
| 296 | 10 | 2 | 8  | 9  | 1 | 8  | 7387.3579 | 0.0064  |
| 297 | 9  | 5 | 5  | 8  | 4 | 4  | 7388.2018 | 0.0014  |
| 298 | 9  | 5 | 4  | 8  | 4 | 4  | 7389.1990 | 0.0009  |
| 299 | 9  | 5 | 5  | 8  | 4 | 5  | 7396.3694 | -0.0006 |
| 300 | 9  | 5 | 4  | 8  | 4 | 5  | 7397.3677 | 0.0000  |
| 301 | 11 | 3 | 8  | 10 | 3 | 7  | 7415.0239 | 0.0057  |
| 302 | 10 | 1 | 9  | 9  | 0 | 9  | 7600.3019 | 0.0056  |
| 303 | 10 | 4 | 7  | 9  | 3 | 6  | 7601.0025 | -0.0047 |
| 304 | 11 | 3 | 9  | 10 | 2 | 8  | 7604.0504 | -0.0019 |
| 305 | 10 | 3 | 8  | 9  | 2 | 8  | 7638.6375 | 0.0052  |
| 306 | 10 | 2 | 9  | 9  | 1 | 9  | 7644.8406 | 0.0092  |
| 307 | 10 | 4 | 6  | 9  | 3 | 6  | 7646.1130 | -0.0050 |
| 308 | 12 | 0 | 12 | 11 | 1 | 11 | 7680.6587 | 0.0006  |
| 309 | 12 | 1 | 12 | 11 | 1 | 11 | 7681.1604 | -0.0005 |
| 310 | 12 | 0 | 12 | 11 | 0 | 11 | 7681.6648 | -0.0025 |
| 311 | 12 | 1 | 12 | 11 | 0 | 11 | 7682.1710 | 0.0006  |
| 312 | 8  | 8 | 0  | 7  | 7 | 0  | 7693.0346 | 0.0003  |
| 313 | 8  | 8 | 0  | 7  | 7 | 1  | 7693.0346 | 0.0003  |
| 314 | 8  | 8 | 1  | 7  | 7 | 0  | 7693.0346 | 0.0003  |
| 315 | 8  | 8 | 1  | 7  | 7 | 1  | 7693.0346 | 0.0003  |
| 316 | 9  | 6 | 4  | 8  | 5 | 3  | 7715.7114 | 0.0526  |
| 317 | 9  | 6 | 3  | 8  | 5 | 3  | 7715.7114 | 0.0269  |
| 318 | 9  | 6 | 4  | 8  | 5 | 4  | 7715.9165 | -0.0319 |
| 319 | 9  | 6 | 3  | 8  | 5 | 4  | 7715.9165 | -0.0576 |
| 320 | 12 | 2 | 10 | 11 | 3 | 9  | 7752.3950 | -0.0057 |
| 321 | 10 | 4 | 7  | 9  | 3 | 7  | 7782.7155 | -0.0038 |
| 322 | 12 | 1 | 11 | 11 | 2 | 10 | 7798.4859 | 0.0037  |
| 323 | 12 | 2 | 11 | 11 | 2 | 10 | 7814.6236 | 0.0011  |
| 324 | 12 | 1 | 11 | 11 | 1 | 10 | 7826.9380 | 0.0031  |
| 325 | 10 | 4 | 6  | 9  | 3 | 7  | 7827.8263 | -0.0038 |
| 326 | 12 | 2 | 11 | 11 | 1 | 10 | 7843.0747 | -0.0004 |
| 327 | 12 | 3 | 10 | 11 | 3 | 9  | 7923.3558 | 0.0077  |
| 328 | 12 | 8 | 5  | 11 | 8 | 4  | 7958.0592 | -0.0090 |
| 329 | 12 | 8 | 4  | 11 | 8 | 3  | 7958.0592 | -0.0096 |
| 330 | 12 | 7 | 6  | 11 | 7 | 5  | 7963.0388 | 0.0233  |
| 331 | 12 | 7 | 5  | 11 | 7 | 4  | 7963.0388 | -0.0018 |
| 332 | 12 | 6 | 7  | 11 | 6 | 6  | 7970.5159 | -0.0700 |
| 333 | 12 | 6 | 6  | 11 | 6 | 5  | 7971.2473 | 0.0013  |
| 334 | 12 | 4 | 9  | 11 | 4 | 8  | 7975.9171 | -0.0001 |
| 335 | 12 | 5 | 8  | 11 | 5 | 7  | 7980.0593 | 0.0049  |
| 336 | 12 | 5 | 7  | 11 | 5 | 6  | 7990.1175 | 0.0079  |
| 337 | 12 | 2 | 10 | 11 | 2 | 9  | 7996.9715 | 0.0066  |
